# Supplementary material for: Prepositioning and Local Purchasing for Emergency Operations Under Budget, Demand, and Supply Uncertainty
Source: Atypon-hosted journal article supplement (doi:10.1287/msom.2020.0956), 2021-03-18
Supplement: msom.2020.0956.sm1.pdf [file msom.2020.0956.sm1.pdf]

## Online Appendix: Pre-Positioning and Local-Purchasing for Emergency Operations Under Budget and Supply Uncertainty

Mahyar Eftekhari, Jing-Sheng Song, Scott Webster

**Proofs of Proposition 1 and Proposition 2.** Follows the proof of Proposition 5 with  $t_x = \infty$  and  $n = 1$ .  $\square$

**Lemma A1.** *If  $D$  and  $Q$  share the same marginal density function that is symmetric, then the density function of  $(D - \mu_D) - (Q - \mu_Q)$  is symmetric about mean zero.*

**Proof.** We write  $D$  and  $Q$  in terms of corresponding standard random variables,  $D = \mu_D + \sigma_D Z_D$ ,  $Q = \mu_Q + \sigma_Q Z_Q$ . Note that  $(D - \mu_D) - (Q - \mu_Q) = \sigma_D Z_D - \sigma_Q Z_Q$ . The marginal and conditional density functions of  $(Z_D, Z_Q)$  satisfy  $\phi_{z_D}(\cdot) = \phi_{z_Q}(\cdot) = \phi(\cdot)$  with  $\phi(z) = \phi(-z)$ ,  $\phi_{z_D|z_Q}(x|y) = \phi_{z_D|z_Q}(-x|-y)$ ,  $\phi_{z_Q|z_D}(x|y) = \phi_{z_Q|z_D}(-x|-y)$  for all  $x$  and  $y$  (due to symmetry). Let  $\Omega(x) = \{z_D, z_Q \mid \sigma_D z_D - \sigma_Q z_Q \geq x\}$ . Then

$$\begin{aligned} P[\sigma_D Z_D - \sigma_Q Z_Q \geq x] &= \iint_{\Omega(x)} \phi_{z_D|z_Q}(z_D|z_Q) \phi(z_Q) dz_D dz_Q = \iint_{\Omega(x)} \phi_{z_D|z_Q}(-z_D|-z_Q) \phi(-z_Q) dz_D dz_Q \\ &= \iint_{\{z_D, z_Q \mid \sigma_D z_D - \sigma_Q z_Q \leq -x\}} \phi_{z_D|z_Q}(z_D|z_Q) \phi(z_Q) dz_D dz_Q \\ &\quad (\text{because } \sigma_D(-z_D) - \sigma_Q(-z_Q) \leq -x \text{ for all } (z_D, z_Q) \in \Omega(x)) \\ &= P[\sigma_D Z_D - \sigma_Q Z_Q \leq -x]. \quad \square \end{aligned}$$

**Proof of Proposition 3.** Since  $b > \bar{b}$ , it follows from Proposition 2 that  $C(x) = C_a(x)$ . To consider the effect of changes in unit cost, we augment expected cost to include parameter  $c$ :

$$\begin{aligned} C(x) = C_a(x) &= c \left[ \alpha \mu_D + i \mu_T x + (1 - \alpha) E[S(x)] + (v/c - 1) E[(S(x) - x)^+] \right] \\ x^* &= \min\{(x_+)^+, b/c\} = \min\left\{\left(\bar{F}_{D-Q}^{-1}(\beta^*)\right)^+, b/c\right\} = \min\left\{\left(\bar{F}_{D-Q}^{-1}\left(\frac{i \mu_T}{v/c - 1}\right)\right)^+, b/c\right\} \end{aligned} \quad (i)$$

(see propositions 1 and 2). Parts (a) – (c). From (i) it follows that  $x^*$  is unaffected by changes in  $\alpha$ ,  $\gamma$ ,  $\mu_R$ ,  $\sigma_R$ , and  $\sigma_T$ ; is increasing in  $1/\mu_T$ ,  $v$ , and  $b$ ; is decreasing in  $i$  and  $c$ . To clarify the effects of increasing  $\mu_D$  and  $\mu_Q$ , we write in terms of standard random variables,  $D = \mu_D + \sigma_D Z_D$ ,  $Q = \mu_Q + \sigma_Q Z_Q$ . Let  $\Delta = \mu_D - \mu_Q$ ,

which is increasing in  $\mu_D$  and decreasing in  $\mu_Q$ . For the sign of  $\frac{d(x_+)^+}{d\Delta}$ . It is sufficient to analyze the case

of  $P[D - Q] > \frac{i \mu_T}{v/c - 1}$ . (If  $P[D - Q > 0] < \frac{i \mu_T}{v/c - 1}$ , then  $\frac{d(x_+)^+}{d\Delta} = 0$ . If  $P[D - Q > 0] = \frac{i \mu_T}{v/c - 1}$ , then

either the left or right derivative is zero, with the nonzero directional derivative matching the sign of

$\frac{d(x_+)^+}{d\Delta}$  for the case of  $P[D - Q > 0] > \frac{i \mu_T}{v/c - 1}$ .) Note that

$$1 - \frac{i\mu_T}{v/c - 1} = P\left[\left(\Delta + \sigma_D Z_D - \sigma_Q Z_Q\right)^+ \leq x_+\right] = P\left[\sigma_D Z_D - \sigma_Q Z_Q \leq x_+ - \Delta\right]. \quad (\text{ii})$$

Thus, to maintain the above identity, any increase (decrease) in  $\Delta$  must be offset by an increase (decrease)

in  $x_+$ . Therefore,  $\frac{d(x_+)^+}{d\Delta} \geq 0$ , i.e.,  $x^*$  is increasing in  $\mu_D$  and decreasing in  $\mu_Q$ . Part (d). Rewrite the right-

hand side of (ii) as  $P\left[k \times (\sigma_D Z_D - \sigma_Q Z_Q) \leq x_+ - \Delta\right] = P\left[\sigma_D Z_D - \sigma_Q Z_Q \leq \frac{x_+ - \Delta}{k}\right]$  where  $k = 1$ . Thus,

$\frac{x_+ - \Delta}{k}$  is decreasing (increasing) in proportionality factor  $k$  if  $x_+ > \mu_D - \mu_Q$  ( $x_+ < \mu_D - \mu_Q$ ). Therefore,  $x_+$

(and  $x^*$ ) is increasing (decreasing) in  $k$  if  $x_+ > \mu_D - \mu_Q$  ( $x_+ < \mu_D - \mu_Q$ ). Part (e). Due to Lemma A1,  $\zeta = \sigma_D Z_D - \sigma_Q Z_Q$  is a symmetric random variable about mean zero. Recall that  $(Z_D, Z_Q)$  correlation (and

covariance) can be expressed as  $\iint z_D z_Q \phi_{z_D|z_Q}(z_D | z_Q) \phi_{z_Q}(z_Q) dz_D dz_Q =$

$\iint z_D z_Q \phi_{z_Q|z_D}(z_Q | z_D) \phi_{z_D}(z_D) dz_Q dz_D$  (which is also the value of the  $(D, Q)$  correlation coefficient). If we

keep the marginal distributions fixed (i.e., other things equal), we see that an increase in negative

correlation, corresponds to expansions (compressions) of the density  $\phi(z_D | z_Q)$  for realizations where  $z_D$

is small (large) and  $z_Q$  is large (small). The consequent effect is an increase in the tails and a reduction in

the mid-region of the symmetric density function (about mean zero) of random variable  $\zeta$ . Thus, if  $x_+ - \Delta > 0$  ( $x_+ - \Delta < 0$ ), an increase in negative correlation leads to an decrease (increase) in

$P\left[\sigma_D Z_D - \sigma_Q Z_Q \leq x_+ - \Delta\right]$ , and from (ii) it follows that  $x_+$  (and  $x^*$ ) is increasing (decreasing) in negative

correlation. Similarly, an increase in  $\sigma_D$  or  $\sigma_Q$  increases the variance of  $\zeta$ , i.e., the tails of the symmetric density function of  $\zeta$  expand and the mid-region shrinks. Therefore, if  $x_+ - \Delta > 0$  ( $x_+ - \Delta < 0$ ), an increase

in  $\sigma_D$  or  $\sigma_Q$  leads to a decrease (increase) in  $P\left[\sigma_D Z_D - \sigma_Q Z_Q \leq x_+ - \Delta\right]$ , and thus from (ii) it follows that

$x_+$  (and  $x^*$ ) is increasing (decreasing) in  $\sigma_D$  or  $\sigma_Q$ .  $\square$

**Proof of Proposition 4.** In the following analysis, we assume  $x^0 > 0$ . This assumption does not affect our conclusions, e.g., if  $(x^0)^+ = 0$ , then  $(x^0)^+$  remains unchanged as a parameter changes over some interval.

Outside of this interval, the directional effects we obtain for the case of  $x^0 > 0$  apply. As in the proof of Proposition 3, we augment relevant expressions to include parameter  $c$  in order to analyze the effect of

changes in unit cost:  $\hat{b}(x, R, T) = b + \gamma T + R - cx$ ,  $S(x) = \left(D - \min\left\{Q, \frac{\hat{b}(x, R, T)}{\alpha c}\right\}\right)^+$ ,  $C(x) =$

$c \left[ \alpha \mu_D + i \mu_T x + (1 - \alpha) E[S(x)] + \left(\frac{v}{c} - 1\right) E\left[(S(x) - x)^+\right] \right]$ . We write  $(D, Q, R, T)$  in terms of standard

random variables:  $D = \mu_D + \sigma_D Z_D$ ,  $Q = \mu_Q + \sigma_Q Z_Q$ ,  $R = \mu_R + \sigma_R Z_R$ ,  $T = \mu_T + \sigma_T Z_T$  with  $E[Z_j] = 0$ ,  $V[Z_j] = 1$ ,

$j \in \{D, Q, R, T\}$ , pdf  $\phi_{DQR}$  of  $(Z_D, Z_Q, Z_R)$ , and pdf  $\phi_T$  of  $Z_T$ . Let  $(z_D, z_Q, z_R, z_T)$  denote a realization of  $(Z_D, Z_Q, Z_R, Z_T)$ . Then  $C'(x) = cm(x) = c[m_c(x) - m_s(x)]$ ,  $m_c(x) = i\mu_T + \frac{1-\alpha}{\alpha} \left( P[\Omega_1(x)] + \left(\frac{v}{c} - 1\right) P[\Omega_2(x)] \right)$ ,

$m_s(x) = \left(\frac{v}{c} - 1\right) P[\Omega_3(x)]$  and the sign of  $x^{o'}(u)$  for  $u \in \{\alpha, b, c, i, v, \mu_D, \mu_Q, \mu_R, \mu_T, \mu_R, \sigma_D, \sigma_Q, \sigma_T, \sigma_R\}$  is

the opposite of the sign of  $\frac{\partial m(x^o)}{\partial u}$  (follows from the implicit function theorem and the convexity of

$C(x)$ ). Parameters  $i$  and  $v$  are not included in  $\Omega_i$ . It is clear that  $\frac{\partial m(x^o)}{\partial i} = \mu_T > 0$ , which implies  $x^*$  is

decreasing in  $i$ . Note that  $P[\Omega_1] \geq P[\Omega_2]$  (because  $\Omega_2 \subset \Omega_1$ ),

$$\begin{aligned} 0 = m(x^o) &= i\mu_T + \frac{1-\alpha}{\alpha} \left( P[\Omega_1(x^o)] + \left(\frac{v}{c} - 1\right) P[\Omega_2(x^o)] \right) - \left(\frac{v}{c} - 1\right) P[\Omega_3(x^o)] \\ &= \frac{v}{c} \left( \frac{1-\alpha}{\alpha} P[\Omega_2(x^o)] - P[\Omega_3(x^o)] \right) + i\mu_T + \frac{1-\alpha}{\alpha} \left( P[\Omega_1(x^o)] - P[\Omega_2(x^o)] \right) + P[\Omega_3(x^o)] \\ &\geq \frac{v}{c} \left( \frac{1-\alpha}{\alpha} P[\Omega_2(x^o)] - P[\Omega_3(x^o)] \right), \end{aligned} \quad (\text{iii})$$

which implies  $\frac{\partial m(x^o)}{\partial v} \leq 0$ . Therefore,  $x^*$  is increasing in  $v$ . Note that

$$\frac{\partial P[\Omega_1(x^o)]}{\partial u} \leq 0 \text{ for } u \in \{b, \gamma, \mu_R, \mu_T\}, \quad \frac{\partial P[\Omega_1(x^o)]}{\partial u} \geq 0 \text{ for } u \in \{\alpha, c, \mu_D, \mu_Q\} \quad (\text{iv})$$

$$\frac{\partial P[\Omega_2(x^o)]}{\partial u} \leq 0 \text{ for } u \in \{b, \gamma, \mu_R, \mu_T\}, \quad \frac{\partial P[\Omega_2(x^o)]}{\partial u} \geq 0 \text{ for } u \in \{\alpha, c, \mu_D, \mu_Q\} \quad (\text{v})$$

$$\frac{\partial P[\Omega_3(x^o)]}{\partial u} \geq 0 \text{ for } u \in \{b, \gamma, \mu_D, \mu_R, \mu_T\}, \quad \frac{\partial P[\Omega_3(x^o)]}{\partial u} \leq 0 \text{ for } u \in \{\alpha, c, \mu_Q\}. \quad (\text{vi})$$

$$\frac{\partial m(x^o)}{\partial u} = \frac{\partial}{\partial u} \left[ i\mu_T + \left(\frac{1}{\alpha} - 1\right) \left( P[\Omega_1(x^o)] + \left(\frac{v}{c} - 1\right) P[\Omega_2(x^o)] \right) - \left(\frac{v}{c} - 1\right) P[\Omega_3(x^o)] \right] \quad (\text{vii})$$

is nonpositive for  $u \in \{b, \gamma, \mu_R\}$  (follows from (iv) – (vi)). Accordingly,  $x^* = \min\{x^o, b/c\}$  is increasing

in  $b, \gamma$ , and  $\mu_R$ . Similarly, (vii) is nonnegative for  $u = \mu_Q$ . Applying (iv) – (vi) and noting inequality (iii), it follows that (vii) is nonnegative for  $u = c$ . Accordingly, i.e.,  $x^* = \min\{x^o, b/c\}$  is decreasing in  $c$  and  $\mu_Q$ .

The sign of (vii) is ambiguous for  $u \in \{\alpha, \mu_D, \mu_T\}$ , i.e., there are some elements of the  $m(x^o)$  function that are increasing in these parameters and some that are decreasing. However, if  $i = 0$ , then it is clear that

$\partial m(x^0) / \partial \mu_T \leq 0$ , and thus  $x^*$  is increasing in  $\mu_T$  (and decreasing in  $1/\mu_T$ ). Lastly, we consider

$\partial m(x^0) / \partial u$  for  $u \in \{\sigma_D, \sigma_Q, \sigma_R, \sigma_T\}$ . Note that the sign of  $\sigma_D z_D$  depends on the sign of realization  $z_D$  of  $Z_D$ , which can be negative and can be positive (i.e., recall  $E[Z_D] = 0$ ). As a consequence, just as in Proposition 3, the value of  $\partial m(x^0) / \partial \sigma_D$  can be positive or negative depending on the parameter values and distribution functions. The same arguments apply to  $\sigma_Q, \sigma_R$ , and  $\sigma_T$ .  $\square$

**Proof of Proposition 5.** Part (a).  $\bar{C}_n(x, y_n)$  can be expressed as the sum of two univariate functions:

$H_n(y_n)$  = cost of holding  $x_1$  in period 1 + ... + cost of holding  $x_{n-1}$  in period  $n-1 = it_x y_n$ ,  $K_n(x)$  = expected cost of holding  $x$  in period  $n$  and cost of disaster given that the disaster occurs in period  $n =$

$i\mu_n x + (1-\alpha)E[S_n(x)] + (v-1)E(S_n(x) - x)^+$ . Define  $J_n^*$  = optimal expected cost-to-go excluding

holding cost of past prepo levels and given the disaster occurs in period  $n$  or later, and note that  $J_n^* =$

$C_n^*(y_n) - H_n(y_n) = C_n^*(y_n) - it_x y_n$ , which is independent of  $y_n$  (i.e.,  $y_n$  only affects the holding cost over past periods). Substituting the above into (6),

$$C_n^*(y_n) = \min_{x \leq b_n} \left\{ \begin{aligned} & \left[ H_n(y_n) + K_n(x) \right] P \left[ T \in [(n-1)t_x, nt_x] \mid T \geq (n-1)t_x \right] \\ & + \left[ H_{n+1}(x + y_n) + J_{n+1}^* \right] P \left[ T \geq nt_x \mid T \geq (n-1)t_x \right] \end{aligned} \right\}$$

$$= \left( \begin{aligned} & \left\{ \begin{aligned} & it_x y_n + i\mu_n x + (1-\alpha)E[S_n(x)] \\ & + (v-1)E(S_n(x) - x)^+ \end{aligned} \right\} \\ & + it_x(x + y_n) \frac{P[T \geq nt_x \mid T \geq (n-1)t_x]}{P[T \in [(n-1)t_x, nt_x] \mid T \geq (n-1)t_x]} \end{aligned} \right) \cdot$$

$$\left( \times P[T \in [(n-1)t_x, nt_x] \mid T \geq (n-1)t_x] + J_{n+1}^* P[T \geq nt_x \mid T \geq (n-1)t_x] \right)$$

From the above expression, it follows that  $x_n^* = \arg \min_{x \leq b_n} \hat{C}_n(x, y_n)$  where

$$\hat{C}_n(x, y_n) = \left( \begin{aligned} & it_x y_n + i\mu_n x + (1-\alpha)E[S_n(x)] + (v-1)E(S_n(x) - x)^+ \\ & + it_x(x + y_n) \frac{P[T \geq nt_x \mid T \geq (n-1)t_x]}{P[T \in [(n-1)t_x, nt_x] \mid T \geq (n-1)t_x]} \end{aligned} \right) \cdot$$

$$\frac{dE[S_n(x)]}{dx} = \frac{1}{\alpha} P[\Omega_1(x)]$$

$$\frac{dE(S_n(x) - x)^+}{dx} = \frac{1-\alpha}{\alpha} P[\Omega_2(x)] - P[\Omega_3(x)]$$

$$\frac{d^2 E[S_n(x)]}{dx^2} = \frac{1}{\alpha} \frac{d}{dx} P \left[ D > \frac{b_n + \gamma T_n + R - x}{\alpha}, Q > \frac{b_n + \gamma T_n + R - x}{\alpha} \right] \geq 0$$

$$\frac{d^2 E(S_n(x) - x)^+}{dx^2} = \frac{1-\alpha}{\alpha} \frac{d}{dx} P \left[ \begin{array}{l} D > \frac{b_n + \gamma T_n + R}{\alpha} - \left( \frac{1-\alpha}{\alpha} \right) x, \\ Q > \frac{b_n + \gamma T_n + R - x}{\alpha} \end{array} \right] - \frac{d}{dx} P \left[ \begin{array}{l} D > Q + x, \\ Q \leq \frac{b_n + \gamma T_n + R - x}{\alpha} \end{array} \right] \geq 0$$

$$p_n = P[T \in [(n-1)t_x, nt_x) | T \geq (n-1)t_x].$$

Therefore,  $\hat{C}_n(x, y_n)$  is convex in  $x$ , and the unconstrained optimal prepo satisfies  $0 = \frac{\partial \hat{C}_n(x^\circ, y_n)}{\partial x} =$

$$m_c(x) - m_s(x) = m(x), \quad m_c(x) = i \left( \mu_n + t_x \frac{1-p_n}{p_n} \right) + \frac{1-\alpha}{\alpha} (P[\Omega_1(x)] + (v-1)P[\Omega_2(x)]), \quad m_s(x) =$$

$(v-1)P[\Omega_3(x)]$ . Thus, (7) follows from KKT conditions. To prove the upper bound, note that

$$m_c(x) = i \left( \mu_n + t_x \frac{1-p_n}{p_n} \right) + \left( \frac{1-\alpha}{\alpha} \right) (P[\Omega_1(x)] + (v-1)P[\Omega_2(x)]) \geq i \left( \mu_n + t_x \frac{1-p_n}{p_n} \right) = \underline{m}_c(x)$$

$$m_s(x) = (v-1)P \left[ D > Q + x, Q \leq \frac{b_n + \gamma T_n + R - x}{\alpha} \right] \leq (v-1)\bar{F}_{D-Q}(x) = \bar{m}_s(x).$$

$$0 = \frac{\partial \hat{C}_n(x^\circ, y_n)}{\partial x} = m(x^\circ) = m_c(x^\circ) - m_s(x^\circ) \geq \underline{m}_c(x^\circ) - \bar{m}_s(x^\circ) = \underline{m}(x^\circ),$$

which implies  $x_+ = \underline{m}^{-1}(0) \geq m^{-1}(0) = x^\circ$ , and thus  $x_n^* \leq \bar{x}_n^*$ . Part (b). From the above proof, we see that  $\bar{x}_n^*$  is the optimal prepo for an alternative model where the local budget constraint is ignored, or equivalently,

the local budget is infinity. That is, under an infinite local budget,  $P[\Omega_1(x)] = P[\Omega_2(x)] = 0$ ,

$$P[\Omega_3(x)] P[D > Q + x] = \bar{F}_{D-Q}(x). \quad \text{Note that } \max \{ \alpha \min \{ d, q \} - \gamma t - r : (d, q, r, t) \in \Omega \} =$$

$\max \{ \alpha \min \{ d, q \} - r : (d, q, r) \in \Omega \} - \gamma T_n$  is an upper limit on the funds needed for local spend. Thus, if

the budget at the beginning of time  $n$  is  $\bar{b}_n = \max \{ \alpha \min \{ d, q \} - r : (d, q, r) \in \Omega \} - \gamma T_n + (x_+)^+$  or more

(i.e.,  $b_n \geq \bar{b}_n$ ), then the local spend constraint is assured to be not binding, which implies that the optimal

solution obtained when ignoring the local spend constraint is optimal for the true problem, i.e.,  $x_n^* = \bar{x}_n^*$ .

Part (c). Note that

$$P \left[ \begin{array}{l} D > \frac{b_n + \gamma T_n + R - x}{\alpha}, \\ Q > \frac{b_n + \gamma T_n + R - x}{\alpha} \end{array} \right] \leq P \left[ D > \frac{b_n + \gamma T_n + R - x}{\alpha} \right] P \left[ Q > \frac{b_n + \gamma T_n + R - x}{\alpha} \right]$$

$$\leq \bar{F}_Q \left( \frac{b_n - x}{\alpha} \right) \bar{F}_D \left( \frac{b_n - x}{\alpha} \right)$$

$$\begin{aligned}
P \left[ \begin{array}{l} D > \frac{b_n + \gamma T_n + R}{\alpha} - \left( \frac{1-\alpha}{\alpha} \right) x, \\ Q > \frac{b_n + \gamma T_n + R - x}{\alpha} \end{array} \right] &\leq P \left[ D > \frac{b_n + \gamma T_n + R - x}{\alpha} + x \right] P \left[ Q > \frac{b_n + \gamma T_n + R - x}{\alpha} \right] \\
&\leq \bar{F}_Q \left( \frac{b_n - x}{\alpha} \right) \bar{F}_D \left( \frac{b_n - x}{\alpha} + x \right) \\
P \left[ \begin{array}{l} D > Q + x, \\ Q \leq \frac{b_n + \gamma T_n + R - x}{\alpha} \end{array} \right] &\geq P \left[ D > Q + x \right] P \left[ Q \leq \frac{b_n + \gamma T_n + R - x}{\alpha} \right] \geq \bar{F}_{D-Q}(x) F_Q \left( \frac{b_n - x}{\alpha} \right)
\end{aligned}$$

where the first inequality in each case follows from Assumption 1, and the second inequality follows from nonnegativity of  $T_n$  and  $R$ . Therefore,

$$\begin{aligned}
m_c(x) &= i \left( \mu_n + t_x \frac{1-p_n}{p_n} \right) + \left( \frac{1-\alpha}{\alpha} \right) \left( P \left[ \begin{array}{l} D > \frac{b_n + \gamma T_n + R - x}{\alpha}, \\ Q > \frac{b_n + \gamma T_n + R - x}{\alpha} \end{array} \right] \right. \\
&\quad \left. + (v-1) P \left[ \begin{array}{l} D > \frac{b_n + \gamma T_n + R}{\alpha} - \left( \frac{1-\alpha}{\alpha} \right) x, \\ Q > \frac{b_n + \gamma T_n + R - x}{\alpha} \end{array} \right] \right) \\
&\leq i \left( \mu_n + t_x \frac{1-p_n}{p_n} \right) + \left( \frac{1-\alpha}{\alpha} \right) \bar{F}_Q \left( \frac{b_n - x}{\alpha} \right) \left( \bar{F}_D \left( \frac{b_n - x}{\alpha} \right) \right. \\
&\quad \left. + (v-1) \bar{F}_D \left( \frac{b_n - x}{\alpha} + x \right) \right) = \bar{m}_c(x)
\end{aligned}$$

$$m_s(x) = (v-1) P \left[ D > Q + x, Q \leq \frac{b_n + \gamma T_n + R - x}{\alpha} \right] \geq (v-1) \bar{F}_{D-Q}(x) F_Q \left( \frac{b_n - x}{\alpha} \right) = \underline{m}_s(x).$$

Therefore,  $0 = \frac{\partial \hat{C}_n(x^\circ, y_n)}{\partial x} = m(x^\circ) = m_c(x^\circ) - m_s(x^\circ) \leq \bar{m}_c(x^\circ) - \underline{m}_s(x^\circ) = \bar{m}(x^\circ)$ , which implies  $x_- =$

$\bar{m}^{-1}(0) \leq m^{-1}(0) = x^\circ$ , and thus  $x_n^* \geq \underline{x}_n^*$ . Part (d). Note that  $x_n^* = \min \left\{ (x^\circ)^+, b_n \right\} \geq \underline{x}_n^- = \min \left\{ (x_-)^+, b_n \right\}$ ,

$x^\circ \geq x_-$  and  $(x^\circ)^+ \geq (x_-)^+$ . Therefore, if  $\underline{x}_n^- = b_n$ , then  $x_n^* = \min \left\{ (x^\circ)^+, b_n \right\} = b_n = \underline{x}_n^-$ . Part (e). The

inequalities are proved above in Part (c).  $\square$

**Proof of Lemma 1.**  $\mu_n^+ = E \left[ T - (n-1)t_x \mid (n-1)t_x \leq T < nt_x \right] p_n + E \left[ T - (n-1)t_x \mid T \geq nt_x \right] (1-p_n) =$

$$\mu_n p_n + \left( t_x + E \left[ T - nt_x \mid T \geq nt_x \right] \right) (1-p_n) = \mu_n p_n + \left( \mu_n^+ + t_x - \left( \mu_n^+ - \mu_{n+1}^+ \right) \right) (1-p_n) =$$

$\mu_n + \left( t_x - \left( \mu_n^+ - \mu_{n+1}^+ \right) \right) \frac{1-p_n}{p_n}$  (we move  $\mu_n^+$  to the left and divide by  $p_n$ ). Rearranging yields Lemma 1.  $\square$

**Proof of Corollary 1.** Due to the memoryless property of an exponential random variable,  $\mu_n^+ =$

$$E[T - (n-1)t_x | T - (n-1)t_x \geq 0] = E[T - nt_x | T - nt_x \geq 0] = \mu_{n+1}^+, \mu_n^+ = E[T - (n-1)t_x | T - (n-1)t_x \geq 0] = E[T | T \geq 0] = \mu_1^+ = \mu_T. \text{ Therefore, from Lemma 1, } \mu_n + t_x \frac{1-p_n}{p_n} = \mu_T. \square$$

**Proof of Proposition 6.** Part (a).  $x^* = \min\left\{\left(m^{-1}(0)\right)^+, b\right\}$ ,  $m(x) = m_c(x) - m_s(x)$ ,  $x_n^* = \min\left\{\left(m^{-1}(0)\right)^+, b_n\right\}$ ,

$$m(x) = m_c(x) - m_s(x), b_n = b + \gamma(n-1)t_x,$$

$$m_c(x) = i\mu_T + \frac{1-\alpha}{\alpha} \left( P \left[ \begin{array}{l} D > \frac{b + \gamma T + R - x}{\alpha} \\ Q > \frac{b + \gamma T + R - x}{\alpha} \end{array} \right] + (v-1) P \left[ \begin{array}{l} D > \frac{b + \gamma T + R - x}{\alpha} + x \\ Q > \frac{b + \gamma T + R - x}{\alpha} \end{array} \right] \right)$$

$$m_s(x) = (v-1) P \left[ D > Q + x, Q \leq \frac{b + \gamma T + R - x}{\alpha} \right]$$

$$m_c(x) = i\mu_T + \frac{1-\alpha}{\alpha} \left( P \left[ \begin{array}{l} D > \frac{b_n + \gamma T_n + R - x}{\alpha} \\ Q > \frac{b_n + \gamma T_n + R - x}{\alpha} \end{array} \right] + (v-1) P \left[ \begin{array}{l} D > \frac{b_n + \gamma T_n + R - x}{\alpha} + x \\ Q > \frac{b_n + \gamma T_n + R - x}{\alpha} \end{array} \right] \right)$$

$$m_s(x) = (v-1) P \left[ D > Q + x, Q \leq \frac{b_n + \gamma T_n + R - x}{\alpha} \right].$$

Note that  $f_{T_n}(t) = \frac{f_T(t)}{F_T(t_x)} \geq f_T(t)$  and  $b_1 = b$ . Thus, for any realization  $(d, q, r)$  of  $(D, Q, R)$  we have

$$P \left[ \begin{array}{l} d > \frac{b_1 + \gamma T_1 + r - x}{\alpha} \\ q > \frac{b_1 + \gamma T_1 + r - x}{\alpha} \end{array} \right] \geq P \left[ \begin{array}{l} d > \frac{b + \gamma T + r - x}{\alpha} \\ q > \frac{b + \gamma T + r - x}{\alpha} \end{array} \right], P \left[ \begin{array}{l} d > \frac{b_1 + \gamma T_1 + r - x}{\alpha} + x \\ q > \frac{b_1 + \gamma T_1 + r - x}{\alpha} \end{array} \right] \geq P \left[ \begin{array}{l} d > \frac{b + \gamma T + r - x}{\alpha} + x \\ q > \frac{b + \gamma T + r - x}{\alpha} \end{array} \right], P \left[ q \leq \frac{b_1 + \gamma T_1 + r - x}{\alpha} \right] \leq P \left[ q \leq \frac{b + \gamma T + r - x}{\alpha} \right]. \text{ Therefore, for } n = 1,$$

$m_c^{\text{dynamic}}(x) \geq m_c^{\text{static}}(x)$  and  $m_s^{\text{dynamic}}(x) \leq m_s^{\text{static}}(x)$ , which implies  $x_1^* \leq x^*$ . Note that the probability

distribution of  $T_1$  and  $T_n$  for any  $n$  are identical. As noted after Table 4,  $b_n \leq b_{n+1}$  for all  $n$ . Therefore, for the dynamic model,  $m_c$  is decreasing in  $n$  and  $m_s$  is increasing in  $n$ , which implies  $x_n^* \leq x_{n+1}^*$  for all  $n$ . Part

(b). If  $\gamma = 0$ , then  $b = b_n$  and  $\hat{b}(x, R, T) = \hat{b}_n(x, R, T_n)$  for any  $n$ , i.e., there is no prepo budget effect and no

local budget effect. From Corollary 1, there is no marginal holding effect. Therefore,  $x^* = x_n^*$  for all  $n$ . Part

(c). Since  $T$  is an exponential random variable, we have  $\underline{T} = \underline{T}_n = 0$ , and thus  $\bar{b} =$

$\max\{\alpha \min\{d, q\} - r : (d, q, r) \in \Omega\} + (\bar{F}_{D-Q}^{-1}(\beta^*))^+ = \bar{b}_n$  for all  $n$ . If  $b \geq \bar{b}$ , then from Proposition 2,  $x^* = \bar{x}^* = (\bar{F}_{D-Q}^{-1}(\beta^*))^+$ . Furthermore, from  $b = b_1 \leq b_2 \leq b_3 \leq \dots$ , it follows that  $b_n \geq \bar{b} = \bar{b}_n$  for all  $n$ . Then from

Proposition 5,  $x_n^* = \bar{x}_n^* = (\bar{F}_{D-Q}^{-1}(\beta^*))^+ = x^*$  for all  $n$ . Part (d).  $\bar{m}_c(x) = i\mu_T +$

$$\frac{1-\alpha}{\alpha} \bar{F}_Q\left(\frac{b-x}{\alpha}\right) \left( \bar{F}_D\left(\frac{b-x}{\alpha}\right) + (v-1) \bar{F}_D\left(\frac{b-x}{\alpha} + x\right) \right), \underline{m}_s(x) = (v-1) \bar{F}_{D-Q}(x) F_Q\left(\frac{b-x}{\alpha}\right), \bar{m}_c(x) =$$

$$i\mu_T + \frac{1-\alpha}{\alpha} \bar{F}_Q\left(\frac{b_n-x}{\alpha}\right) \left( \bar{F}_D\left(\frac{b_n-x}{\alpha}\right) + (v-1) \bar{F}_D\left(\frac{b_n-x}{\alpha} + x\right) \right) \text{ which is decreasing in } n \text{ (because } b_n < b_{n+1}$$

for all  $n$ ; the inequality is strict because  $\gamma > 0$ ),  $\underline{m}_s(x) = (v-1) \bar{F}_{D-Q}(x) F_Q\left(\frac{b_n-x}{\alpha}\right)$  which is increasing in

$n$  (because  $b_n < b_{n+1}$  for all  $n$ ). Therefore,  $\underline{x}_n = \bar{m}^{-1}(0)$  is increasing in  $n$  and  $\underline{x}_n^* = \min\left\{\left(\bar{m}^{-1}(0)\right)^+, b_n\right\}$  is

increasing in  $n$ . Furthermore, since  $b_1 = b$ , the marginal cost and savings functions are identical for the static model and the dynamic model when  $n = 1$ , and thus,

$$\underline{x}^* = \underline{x}_1^* \leq \underline{x}_2^* \leq \underline{x}_3^* \dots \quad (\text{viii})$$

Therefore, if  $\underline{x}^* = b$  and  $\underline{x}_1^* = b = b_1$ , and it follows from propositions 2 and 5 that  $x^* = x_1^* = b$ . From

Proposition 5,  $x_n^* \geq \underline{x}_n^*$  for all  $n$ , which in conjunction with (viii) implies  $x^* \leq x_n^*$  for all  $n$ .  $\square$

**Proof of Proposition 7.** If  $\gamma = 0$ , then the result follows from Proposition 6(b). Suppose  $\gamma > 0$ . Given exponential  $T$  and prepo budget  $b$ , the marginal cost and savings functions are  $m_c(x) =$

$$i\mu_T + \frac{1-\alpha}{\alpha} \left( P[\Omega_1(x)] + (v-1) P[\Omega_2(x)] \right), \underline{m}_s(x) = (v-1) P[\Omega_3(x)] \text{ where } \Omega = \text{support of } (D, Q, R, T_1)$$

and  $T_1 =$  random time to disaster given that the disaster occurs within the review period of length  $t_x$ . The

$$\text{cdf of } T_1 \text{ is } F_{T_1}(x) = \max\left\{0, \min\left\{\left(1 - e^{-\frac{-x}{\mu_r}}\right) \left(1 - e^{-\frac{-t_x}{\mu_r}}\right)^{-1}, 1\right\}\right\}. \text{ Consider review periods } t_x^a < t_x^b \text{ with}$$

corresponding conditional random times to disaster,  $T_1^a$  and  $T_1^b$ . Note that  $T_1^b$  has first-order stochastic

dominance over  $T_1^a$ , i.e.,  $1 - F_{T_1^b}(x) \geq 1 - F_{T_1^a}(x)$  for all  $x$ . Therefore  $P[\Omega_1(x|T_1^b)] \leq P[\Omega_1(x|T_1^a)]$ ,

$$P[\Omega_2(x|T_1^b)] \leq P[\Omega_2(x|T_1^a)], P[\Omega_3(x|T_1^b)] \geq P[\Omega_3(x|T_1^a)], \text{ which implies } m_c(x|T_1^b) \leq m_c(x|T_1^a),$$

$$m_s(x|T_1^b) \geq m_s(x|T_1^a), \text{ and thus } x_{1|T_1^a}^* \leq x_{1|T_1^b}^*. \square$$
